# Supplementary material for: Exploring the Impact of ResearchEazy, an Online Research Series for Medical Students: The Longitudinal Impact of Perspectives and Knowledge of Research
Source: Research Square preprint supplement (doi:10.21203/rs.3.rs-8150678/v1), 2026-01-22
Supplement: Supplementary file 1 [file 15993e6b854a28253d914cc1.xlsx]

## Sheet: Pre course
Participant	Please make your personalised anonymous code. Use the first 3 letters of your first name, then the first 3 letters of the month you were born, and finally the day you were born. E.g Ciaron was bo...	Excluded?	Reason	Knowledge about each type of study (e.g RCT, Cohort, etc.)	Knowing when to use each study type	Writing a methodology	Writing results for a study	Writing a discussion for a study	Writing an introduction for a study	Writing an abstract for a study	Knowing how to make a search strategy	Understanding statistics used in research	Performing statistical analysis	Presenting research as a poster presentation	What is your current level of training?	Have you completed an intercalated BSc during univesity?	Which medical school do you attend/previous medical school you attended?	On a scale of 1-10, how much do you believe that your medical school developed your academic research skillset? (with 1 meaning 'not at all' and 10 meaning vice-versa)	On a scale of 1-10, how much are you interested in an academic career? (with 1 meaning 'not at all' and 10 meaning vice-versa)	Total score in overall quiz (%)	Raw score in quiz (total questions = 40)
1	ADEJAN15	N		3	3	3	3	3	3	3	4	3	3	3	International medical graduate	No	LUTH	5	5	37.5	15
2	ADIMAI09	N		2	2	3	2	3	3	3	3	3	3	3	Medical school - Pre clinical	No	University of Medicine and Pharmacy Carol Davila	3	10	5	2
3	BADJUL26	N		1	2	2	3	3	3	3	2	3	3	2	Medical school - final year student	No	Ovidius University of Constanta, Romania	1	8	7.5	3
4	DEBMAY03	N		2	3	3	3	3	3	3	1	3	2	3	Medical school - clinical	No	Cardiff University	3	5	40	16
5	ELISEP	N		3	3	3	3	3	3	3	3	3	3	3	Medical school - clinical	No	University of Glasgow	4	7	20	8
6	ELSJAN20	N		4	4	4	4	4	4	4	4	4	4	4	Medical school - clinical	Yes	Cardiff	6	10	50	20
7	ETTNOV18	N		4	3	5	4	3	5	5	3	5	4	2	Medical school - Pre clinical	No	Medical University of Lublin	9	10	40	16
8	FAMJUN25	N		4	3	3	3	3	3	3	3	3	3	3	Medical school - clinical	No		5	5	45	18
9	GENDEC05	N		3	4	3	4	4	4	4	3	3	3	4	Medical school - clinical	No	Sofia University	2	8	37.5	15
10	ILSMAR08	N		5	4	5	4	3	5	5	4	4	4	5	Medical school - clinical	Yes	University of Dundee	7	8	52.5	21
11	KAMMAY15	N		3	3	3	3	4	4	4	4	4	4	3	Medical school - Pre clinical	Yes	National University of Science and Technology Islamabad	7	8	37.5	15
12	KRYJUL22	N		3	4	5	5	5	5	4	4	3	2	2	Medical school - Pre clinical	No	University of Malta	6	5	15	6
13	LUQJUL13	N		1	1	2	2	2	2	3	2	1	1	1	Medical school - final year student	Yes	University of Manchester	3	6	40	16
14	MURJUL13	N		3	1	1	1	1	2	2	2	1	1	3	Medical school - clinical	No	University of Debrecen	1	5	45	18
15	naydec10	N		3	4	2	2	2	2	2	2	1	1	1	International medical graduate	No	peoples medical college nawabshah pakistan	1	9	5	2
16	RAJDEC12	N		4	2	4	4	4	4	4	4	4	4	4	Medical school - final year student	Yes	University of Leicester Medical School	7	6	12.5	5
17	SOPDEC24	N		4	4	3	3	4	3	3	4	1	1	3	Medical school - clinical	No	Anglia Ruskin	2	6	5	2
18	SUMMAY18	N		4	3	4	3	2	2	5	2	4	3	5	Medical school - clinical	No	Leicester	3	8	55	22
19	UMNOCT 28	N		5	5	5	5	4	5	4	5	1	1	4	International medical graduate	No	University of Baghdad College of Medicine	7	10	2.5	1
20	WILOCT10	N		5	3	4	5	3	4	4	4	3	3	3	Medical school - final year student	No	Cardiff University	5	10	50	20
21	ZINJUN03	N		2	2	3	2	2	2	1	1	1	1	1	Medical school - clinical	No	University Mohamed 5 of Rabat	1	8	30	12
22	ZOEJUL30	N		3	3	3	3	3	3	2	4	3	4	2	Medical school - clinical	No	UJK kielce	8	7	40	16
				71	66	73	71	68	74	74	68	61	58	64
																				30.5682
																				17.8774
			Median	3	3	3	3	3	3	3	3	1	1	2				4.5	8		15
			Q1	3	2	3	3	3	3	3	2	3	3	3				2.25	6		5
			Q3	4	4	4	4	4	4	4	4	4	4	4				6.75	8.75		18

## Sheet: Post course
Participant	Personalised Code	Excluded?	Reason	Knowledge about each type of study (e.g RCT, Cohort, etc.)	Knowing when to use each study type	Writing a methodology	Writing results for a study	Writing a discussion for a study	Writing an introduction for a study	Writing an abstract for a study	Knowing how to make a search strategy	Understanding statistics used in research	Performing statistical analysis	Presenting research as a poster presentation	On a scale of 1-10, how much are you interested in an academic career? (with 1 meaning 'not at all' and 10 meaning vice-versa)	Total score in overall quiz (%)	Raw score in overall quiz, n (total questions = 60)	Total score in orignal questions (%)	Raw score in original questions, n (total score = 40)	Total score in new questions (%)	Raw score in new questions, n (Total score = 20)
1	ADEJAN15	N		3	3	3	3	3	3	4	4	3	2	3	3	48.3	29	60	24	25	5
2	ADIMAI09	N		5	5	5	4	5	5	4	4	5	4	5	7	73	44	77.5	31	65	13
3	BADJUL26	N		5	5	5	5	5	5	5	5	3	3	5	7	60	36	67.5	27	45	9
4	DEBMAY03	N		3	3	4	4	4	4	4	3	3	3	3	7	56	34	67.5	27	35	7
5	ELISEP	N		5	4	4	3	3	5	5	3	2	2	5	7	65	39	75	30	45	9
6	ELSJAN20	N		5	5	5	5	5	5	5	5	5	5	5	10	62.5	38	65	26	60	12
7	ETTNOV18	N		3	4	5	5	4	4	5	2	5	5	4	7	56	34	65	26	40	8
8	FAMJUN25	N		1	2	2	2	2	2	2	2	1	2	2	8	67	40	60	24	80	16
9	GENDEC05	N		5	5	5	5	5	5	5	5	5	5	5	9	60	36	82.5	33	15	3
10	ILSMAR08	N		5	4	5	5	4	5	4	4	5	4	5	8	70	42	60	24	90	18
11	KAMMAY15	N		1	1	1	1	1	1	1	1	1	1	1	10	50	30	52.5	21	45	9
12	KRYJUL22	N		5	4	5	5	5	5	5	5	4	4	5	9	57.5	35	67.5	27	40	8
13	LUQJUL13	N		5	5	5	5	4	5	5	5	4	4	5	6	43.3	26	52.5	21	25	5
14	MURJUL13	N		5	3	3	4	3	5	4	4	1	1	5	8	45	27	47.5	19	40	8
15	naydec10	N		1	2	2	2	2	2	2	2	1	2	2	9	65	39	70	28	55	11
16	RAJDEC12	N		3	3	3	3	3	3	4	4	3	2	3	8	56	34	70	28	30	6
17	SOPDEC24	N		5	3	5	5	5	5	5	5	3	5	5	7	50	30	57.5	23	35	7
18	SUMMAY18	N		3	4	5	5	4	4	5	2	5	5	4	9	69	41	75	30	55	11
19	UMNOCT 28	N		5	5	5	5	5	5	5	3	4	4	5	9	48	29	60	24	25	5
20	WILOCT10	N		5	5	4	4	5	5	5	5	4	5	5	10	67.5	41	65	26	75	15
21	ZINJUN03	N		3	3	3	4	3	3	4	3	3	3	3	8	60	36	50	20	80	16
22	ZOEJUL30	N		1	1	1	1	1	1	1	1	1	1	1	10	28.3	17	32.5	13	20	4
				82	79	85	85	81	87	89	77	71	72	86	176
			Median	5	4	4.5	4	4	5	4.5	4	3	3.5	5	8	57.1545		62.7273		46.5909
			Q1	3	3	3	3	3	3	4	2.25	2.25	2	3	7	10.6398		11.2839		21.1225
			Q3	5	5	5	5	5	5	5	5	5	5	5	10

## Sheet: Demographic
What is your current level of training?	Participant no.			Completion of previous BSc	Participant no.			On a scale of 1-10, how much do you believe that your medical school developed your academic research skillset? (with 1 meaning 'not at all' and 10 meaning vice-versa)				On a scale of 1-10, how much are you interested in an academic career? (with 1 meaning 'not at all' and 10 meaning vice-versa)	On a scale of 1-10, how much are you interested in an academic career? (with 1 meaning 'not at all' and 10 meaning vice-versa)			Pre-course interest	Post-course interest		Pre-course interest	Post-course interest
International medical graduate	1			No	1			5	1			5	3			5	3		3	2
Medical school - Pre clinical	2			No	2			3	2			10	7			10	7		5	4
Medical school - final year student	3			No	3			1	3			8	7			8	7		4	4
Medical school - clinical	4			No	4			3	4			5	7			5	7		3	4
Medical school - clinical	5			No	5			4	5			7	7			7	7		4	4
Medical school - clinical	6			Yes	6			6	6			10	10			10	10		5	5
Medical school - Pre clinical	7			No	7			9	7			10	7			10	7		5	4
Medical school - clinical	8			No	8			5	8			5	8			5	8		3	4
Medical school - clinical	9			No	9			2	9			8	9			8	9		4	5
Medical school - clinical	10			Yes	10			7	10			8	8			8	8		4	4
Medical school - Pre clinical	11			Yes	11			7	11			8	10			8	10		4	5
Medical school - Pre clinical	12			No	12			6	12			5	9			5	9		3	5
Medical school - final year student	13			Yes	13			3	13			6	6			6	6		3	3
Medical school - clinical	14			No	14			1	14			5	8			5	8		3	4
International medical graduate	15			No	15			1	15			9	9			9	9		5	5
Medical school - final year student	16			Yes	16			7	16			6	8			6	8		3	4
Medical school - clinical	17			No	17			2	17			6	7			6	7		3	4
Medical school - clinical	18			No	18			3	18			8	9			8	9		4	5
International medical graduate	19			No	19			7	19			10	9			10	9		5	5
Medical school - final year student	20			No	20			5	20			10	10			10	10		5	5
Medical school - clinical	21			No	21			1	21			8	8			8	8		4	4
Medical school - clinical	22			No	22			8	22			7	10			7	10		4	5

## Sheet: P values
	Knowledge about each type of study (e.g RCT, Cohort, etc.)	Knowing when to use each study type	Writing a methodology	Writing results for a study	Writing a discussion for a study	Writing an introduction for a study	Writing an abstract for a study	Knowing how to make a search strategy	Understanding statistics used in research	Performing statistical analysis	Presenting research as a poster presentation
p value	<0.001	<0.001	<0.001	<0.001	<0.001	<0.001	<0.001	<0.001	<0.001	<0.001	<0.001

## Sheet: Wilcoxon signed rank test
Knowledge about each type of study (e.g RCT, Cohort, etc.)	Knowledge about each type of study (e.g RCT, Cohort, etc.)					Knowing when to use each study type	Knowing when to use each study type					Writing a methodology	Writing a methodology					Writing results for a study	Writing results for a study	Diff	ABS value	Rank	Rank x +-	Writing a discussion for a study	Writing a discussion for a study	Diff	ABS value	Rank	Rank x +-	Writing an introduction for a study	Writing an introduction for a study	Diff	ABS value	Rank	Rank x +-	Writing an abstract for a study	Writing an abstract for a study	Diff	ABS value	Rank	Rank x +-	Knowing how to make a search strategy	Knowing how to make a search strategy	Diff	ABS value	Rank	Rank x +-	Understanding statistics used in research	Understanding statistics used in research
3	3	0	0	2.5	2.5	3	3	0	0	3	3	3	3	0	0	4.5	4.5	3	3	0	0	3	3	3	3	0	0	2.5	2.5	3	3	0	0	3	3	3	4	1	1	10	10	4	4	0	0	3.5	3.5	3	3
2	5	3	3	19.5	19.5	2	5	3	3	20.5	20.5	3	5	2	2	17.5	17.5	2	4	2	2	17	17	3	5	2	2	18	18	3	5	2	2	16.5	16.5	3	4	1	1	10	10	3	4	1	1	10	10	3	5
1	5	4	4	21.5	21.5	2	5	3	3	20.5	20.5	2	5	3	3	21.5	21.5	3	5	2	2	17	17	3	5	2	2	18	18	3	5	2	2	16.5	16.5	3	5	2	2	18	18	2	5	3	3	20.5	20.5	3	3
2	3	1	1	8	8	3	3	0	0	3	3	3	4	1	1	11.5	11.5	3	4	1	1	9.5	9.5	3	4	1	1	9.5	9.5	3	4	1	1	9.5	9.5	3	4	1	1	10	10	1	3	2	2	16	16	3	3
3	5	2	2	15	15	3	4	1	1	10	10	3	4	1	1	11.5	11.5	3	3	0	0	3	3	3	3	0	0	2.5	2.5	3	5	2	2	16.5	16.5	3	5	2	2	18	18	3	3	0	0	3.5	3.5	3	2
4	5	1	1	8	8	4	5	1	1	10	10	4	5	1	1	11.5	11.5	4	5	1	1	9.5	9.5	4	5	1	1	9.5	9.5	4	5	1	1	9.5	9.5	4	5	1	1	10	10	4	5	1	1	10	10	4	5
4	3	-1	1	8	-8	3	4	1	1	10	10	5	5	0	0	4.5	4.5	4	5	1	1	9.5	9.5	3	4	1	1	9.5	9.5	5	4	-1	1	9.5	-9.5	5	5	0	0	2.5	2.5	3	2	-1	1	10	-10	5	5
4	1	-3	3	19.5	-19.5	3	2	-1	1	10	-10	3	2	-1	1	11.5	-11.5	3	2	-1	1	9.5	-9.5	3	2	-1	1	9.5	-9.5	3	2	-1	1	9.5	-9.5	3	2	-1	1	10	-10	3	2	-1	1	10	-10	3	1
3	5	2	2	15	15	4	5	1	1	10	10	3	5	2	2	17.5	17.5	4	5	1	1	9.5	9.5	4	5	1	1	9.5	9.5	4	5	1	1	9.5	9.5	4	5	1	1	10	10	3	5	2	2	16	16	3	5
5	5	0	0	2.5	2.5	4	4	0	0	3	3	5	5	0	0	4.5	4.5	4	5	1	1	9.5	9.5	3	4	1	1	9.5	9.5	5	5	0	0	3	3	5	4	-1	1	10	-10	4	4	0	0	3.5	3.5	4	5
3	1	-2	2	15	-15	3	1	-2	2	17	-17	3	1	-2	2	17.5	-17.5	3	1	-2	2	17	-17	4	1	-3	3	22	-22	4	1	-3	3	21	-21	4	1	-3	3	21.5	-21.5	4	1	-3	3	20.5	-20.5	4	1
3	5	2	2	15	15	4	4	0	0	3	3	5	5	0	0	4.5	4.5	5	5	0	0	3	3	5	5	0	0	2.5	2.5	5	5	0	0	3	3	4	5	1	1	10	10	4	5	1	1	10	10	3	4
1	5	4	4	21.5	21.5	1	5	4	4	22	22	2	5	3	3	21.5	21.5	2	5	3	3	21.5	21.5	2	4	2	2	18	18	2	5	3	3	21	21	3	5	2	2	18	18	2	5	3	3	20.5	20.5	1	4
3	5	2	2	15	15	1	3	2	2	17	17	1	3	2	2	17.5	17.5	1	4	3	3	21.5	21.5	1	3	2	2	18	18	2	5	3	3	21	21	2	4	2	2	18	18	2	4	2	2	16	16	1	1
3	1	-2	2	15	-15	4	2	-2	2	17	-17	2	2	0	0	4.5	4.5	2	2	0	0	3	3	2	2	0	0	2.5	2.5	2	2	0	0	3	3	2	2	0	0	2.5	2.5	2	2	0	0	3.5	3.5	1	1
4	3	-1	1	8	-8	2	3	1	1	10	10	4	3	-1	1	11.5	-11.5	4	3	-1	1	9.5	-9.5	4	3	-1	1	9.5	-9.5	4	3	-1	1	9.5	-9.5	4	4	0	0	2.5	2.5	4	4	0	0	3.5	3.5	4	3
4	5	1	1	8	8	4	3	-1	1	10	-10	3	5	2	2	17.5	17.5	3	5	2	2	17	17	4	5	1	1	9.5	9.5	3	5	2	2	16.5	16.5	3	5	2	2	18	18	4	5	1	1	10	10	1	3
4	3	-1	1	8	-8	3	4	1	1	10	10	4	5	1	1	11.5	11.5	3	5	2	2	17	17	2	4	2	2	18	18	2	4	2	2	16.5	16.5	5	5	0	0	2.5	2.5	2	2	0	0	3.5	3.5	4	5
5	5	0	0	2.5	2.5	5	5	0	0	3	3	5	5	0	0	4.5	4.5	5	5	0	0	3	3	4	5	1	1	9.5	9.5	5	5	0	0	3	3	4	5	1	1	10	10	5	3	-2	2	16	-16	1	4
5	5	0	0	2.5	2.5	3	5	2	2	17	17	4	4	0	0	4.5	4.5	5	4	-1	1	9.5	-9.5	3	5	2	2	18	18	4	5	1	1	9.5	9.5	4	5	1	1	10	10	4	5	1	1	10	10	3	4
2	3	1	1	8	8	2	3	1	1	10	10	3	3	0	0	4.5	4.5	2	4	2	2	17	17	2	3	1	1	9.5	9.5	2	3	1	1	9.5	9.5	1	4	3	3	21.5	21.5	1	3	2	2	16	16	1	3
3	1	-2	2	15	-15	3	1	-2	2	17	-17	3	1	-2	2	17.5	-17.5	3	1	-2	2	17	-17	3	1	-2	2	18	-18	3	1	-2	2	16.5	-16.5	2	1	-1	1	10	-10	4	1	-3	3	20.5	-20.5	3	1
W +ve	164.5					W +ve	182					W +ve	195					W +ve	190.5					W +ve	194					W +ve	187					W +ve	201.5					W +ve	176					W +ve	179
W -ve	-88.5					W -ve	-71					W -ve	-58					W -ve	-62.5					W -ve	-59					W -ve	-66					W -ve	-51.5					W -ve	-77					W -ve	-74
P value	0.2					P	0.1					P value	<0.05					P value	<0.05					P value	<0.05					P value	>0.05					P value	<0.025					P value	>0.1					P value	>0.05
Median
Q1
Q3
Shapiro Wilks
[truncated: 24 more columns]

## Sheet: Data set RB version
	Knowledge about each type of study (e.g RCT, Cohort, etc.)	Knowledge about each type of study (e.g RCT, Cohort, etc.)					Knowing when to use each study type	Knowing when to use each study type					Writing a methodology	Writing a methodology					Writing results for a study	Writing results for a study					Writing a discussion for a study	Writing a discussion for a study					Writing an introduction for a study	Writing an introduction for a study					Writing an abstract for a study	Writing an abstract for a study					Knowing how to make a search strategy	Knowing how to make a search strategy					Understanding statistics used in research
	3	3	0	0	2.5	2.5	3	3	0	0	3	3	3	3	0	0	4.5	4.5	3	3	0	0	3	3	3	3	0	0	2.5	2.5	3	3	0	0	3	3	3	4	1	1	10	10	4	4	0	0	3.5	3.5	3
	2	5	3	3	19.5	19.5	2	5	3	3	20.5	20.5	3	5	2	2	17.5	17.5	2	4	2	2	17	17	3	5	2	2	18	18	3	5	2	2	16.5	16.5	3	4	1	1	10	10	3	4	1	1	10	10	3
	1	5	4	4	21.5	21.5	2	5	3	3	20.5	20.5	2	5	3	3	21.5	21.5	3	5	2	2	17	17	3	5	2	2	18	18	3	5	2	2	16.5	16.5	3	5	2	2	18	18	2	5	3	3	20.5	20.5	3
	2	3	1	1	8	8	3	3	0	0	3	3	3	4	1	1	11.5	11.5	3	4	1	1	9.5	9.5	3	4	1	1	9.5	9.5	3	4	1	1	9.5	9.5	3	4	1	1	10	10	1	3	2	2	16	16	3
	3	5	2	2	15	15	3	4	1	1	10	10	3	4	1	1	11.5	11.5	3	3	0	0	3	3	3	3	0	0	2.5	2.5	3	5	2	2	16.5	16.5	3	5	2	2	18	18	3	3	0	0	3.5	3.5	3
	4	5	1	1	8	8	4	5	1	1	10	10	4	5	1	1	11.5	11.5	4	5	1	1	9.5	9.5	4	5	1	1	9.5	9.5	4	5	1	1	9.5	9.5	4	5	1	1	10	10	4	5	1	1	10	10	4
	4	3	-1	1	8	-8	3	4	1	1	10	10	5	5	0	0	4.5	4.5	4	5	1	1	9.5	9.5	3	4	1	1	9.5	9.5	5	4	-1	1	9.5	-9.5	5	5	0	0	2.5	2.5	3	2	-1	1	10	-10	5
	4	1	-3	3	19.5	-19.5	3	2	-1	1	10	-10	3	2	-1	1	11.5	-11.5	3	2	-1	1	9.5	-9.5	3	2	-1	1	9.5	-9.5	3	2	-1	1	9.5	-9.5	3	2	-1	1	10	-10	3	2	-1	1	10	-10	3
	3	5	2	2	15	15	4	5	1	1	10	10	3	5	2	2	17.5	17.5	4	5	1	1	9.5	9.5	4	5	1	1	9.5	9.5	4	5	1	1	9.5	9.5	4	5	1	1	10	10	3	5	2	2	16	16	3
	5	5	0	0	2.5	2.5	4	4	0	0	3	3	5	5	0	0	4.5	4.5	4	5	1	1	9.5	9.5	3	4	1	1	9.5	9.5	5	5	0	0	3	3	5	4	-1	1	10	-10	4	4	0	0	3.5	3.5	4
	3	1	-2	2	15	-15	3	1	-2	2	17	-17	3	1	-2	2	17.5	-17.5	3	1	-2	2	17	-17	4	1	-3	3	22	-22	4	1	-3	3	21	-21	4	1	-3	3	21.5	-21.5	4	1	-3	3	20.5	-20.5	4
	3	5	2	2	15	15	4	4	0	0	3	3	5	5	0	0	4.5	4.5	5	5	0	0	3	3	5	5	0	0	2.5	2.5	5	5	0	0	3	3	4	5	1	1	10	10	4	5	1	1	10	10	3
	1	5	4	4	21.5	21.5	1	5	4	4	22	22	2	5	3	3	21.5	21.5	2	5	3	3	21.5	21.5	2	4	2	2	18	18	2	5	3	3	21	21	3	5	2	2	18	18	2	5	3	3	20.5	20.5	1
	3	5	2	2	15	15	1	3	2	2	17	17	1	3	2	2	17.5	17.5	1	4	3	3	21.5	21.5	1	3	2	2	18	18	2	5	3	3	21	21	2	4	2	2	18	18	2	4	2	2	16	16	1
	3	1	-2	2	15	-15	4	2	-2	2	17	-17	2	2	0	0	4.5	4.5	2	2	0	0	3	3	2	2	0	0	2.5	2.5	2	2	0	0	3	3	2	2	0	0	2.5	2.5	2	2	0	0	3.5	3.5	1
	4	3	-1	1	8	-8	2	3	1	1	10	10	4	3	-1	1	11.5	-11.5	4	3	-1	1	9.5	-9.5	4	3	-1	1	9.5	-9.5	4	3	-1	1	9.5	-9.5	4	4	0	0	2.5	2.5	4	4	0	0	3.5	3.5	4
	4	5	1	1	8	8	4	3	-1	1	10	-10	3	5	2	2	17.5	17.5	3	5	2	2	17	17	4	5	1	1	9.5	9.5	3	5	2	2	16.5	16.5	3	5	2	2	18	18	4	5	1	1	10	10	1
	4	3	-1	1	8	-8	3	4	1	1	10	10	4	5	1	1	11.5	11.5	3	5	2	2	17	17	2	4	2	2	18	18	2	4	2	2	16.5	16.5	5	5	0	0	2.5	2.5	2	2	0	0	3.5	3.5	4
	5	5	0	0	2.5	2.5	5	5	0	0	3	3	5	5	0	0	4.5	4.5	5	5	0	0	3	3	4	5	1	1	9.5	9.5	5	5	0	0	3	3	4	5	1	1	10	10	5	3	-2	2	16	-16	1
	5	5	0	0	2.5	2.5	3	5	2	2	17	17	4	4	0	0	4.5	4.5	5	4	-1	1	9.5	-9.5	3	5	2	2	18	18	4	5	1	1	9.5	9.5	4	5	1	1	10	10	4	5	1	1	10	10	3
	2	3	1	1	8	8	2	3	1	1	10	10	3	3	0	0	4.5	4.5	2	4	2	2	17	17	2	3	1	1	9.5	9.5	2	3	1	1	9.5	9.5	1	4	3	3	21.5	21.5	1	3	2	2	16	16	1
	3	1	-2	2	15	-15	3	1	-2	2	17	-17	3	1	-2	2	17.5	-17.5	3	1	-2	2	17	-17	3	1	-2	2	18	-18	3	1	-2	2	16.5	-16.5	2	1	-1	1	10	-10	4	1	-3	3	20.5	-20.5	3
	W +ve	164.5					W +ve	182					W +ve	195					W +ve	190.5					W +ve	194					W +ve	187					W +ve	201.5					W +ve	176					W +ve
	W -ve	-88.5					W -ve	-71					W -ve	-58					W -ve	-62.5					W -ve	-59					W -ve	-66					W -ve	-51.5					W -ve	-77					W -ve
	P value	0.2					P	0.1					P value	<0.05					P value	<0.05					P value	<0.05					P value	>0.05					P value	<0.025					P value	>0.1					P value
	Median	*Note: this is the formatting for the dataset below
	Q1
	Q3
	3	5					3	4					3	4.5					3	4					3	4					3	5					3	4.5					3	4					1
	3	3					2	3					3	3					3	3					3	3					3	3					3	4					2	2.25					3
	4	5					4	5					4	5					4	5					4	5					4	5					4	5					4	5					4
	Shapiro Wilks
P Value	0.07	0.0002					0.0348	0.0379
Passed normality test (alpha=0.05)?	Yes	No					No	No
[truncated: 23 more columns]

## Sheet: Sheet1
	Knowledge about each type of study (e.g RCT, Cohort, etc.)	Knowledge about each type of study (e.g RCT, Cohort, etc.)	Knowing when to use each study type	Knowing when to use each study type	Writing a methodology	Writing a methodology	Writing results for a study	Writing results for a study	Writing a discussion for a study	Writing a discussion for a study	Writing an introduction for a study	Writing an introduction for a study	Writing an abstract for a study	Writing an abstract for a study	Knowing how to make a search strategy	Knowing how to make a search strategy	Understanding statistics used in research	Understanding statistics used in research	Performing statistical analysis	Performing statistical analysis	Presenting research as a poster presentation	Presenting research as a poster presentation	On a scale of 1-10, how much are you interested in an academic career? (with 1 meaning 'not at all' and 10 meaning vice-versa)	On a scale of 1-10, how much are you interested in an academic career? (with 1 meaning 'not at all' and 10 meaning vice-versa)
	3	3	3	3	3	3	3	3	3	3	3	3	3	4	4	4	3	3	3	2	3	3	5	3
	2	5	2	5	3	5	2	4	3	5	3	5	3	4	3	4	3	5	3	4	3	5	10	7
	1	5	2	5	2	5	3	5	3	5	3	5	3	5	2	5	3	3	3	3	2	5	8	7
	2	3	3	3	3	4	3	4	3	4	3	4	3	4	1	3	3	3	2	3	3	3	5	7
	3	5	3	4	3	4	3	3	3	3	3	5	3	5	3	3	3	2	3	2	3	5	7	7
	4	5	4	5	4	5	4	5	4	5	4	5	4	5	4	5	4	5	4	5	4	5	10	10
	4	3	3	4	5	5	4	5	3	4	5	4	5	5	3	2	5	5	4	5	2	4	10	7
	4	1	3	2	3	2	3	2	3	2	3	2	3	2	3	2	3	1	3	2	3	2	5	8
	3	5	4	5	3	5	4	5	4	5	4	5	4	5	3	5	3	5	3	5	4	5	8	9
	5	5	4	4	5	5	4	5	3	4	5	5	5	4	4	4	4	5	4	4	5	5	8	8
	3	1	3	1	3	1	3	1	4	1	4	1	4	1	4	1	4	1	4	1	3	1	8	10
	3	5	4	4	5	5	5	5	5	5	5	5	4	5	4	5	3	4	2	4	2	5	5	9
	1	5	1	5	2	5	2	5	2	4	2	5	3	5	2	5	1	4	1	4	1	5	6	6
	3	5	1	3	1	3	1	4	1	3	2	5	2	4	2	4	1	1	1	1	3	5	5	8
	3	1	4	2	2	2	2	2	2	2	2	2	2	2	2	2	1	1	1	2	1	2	9	9
	4	3	2	3	4	3	4	3	4	3	4	3	4	4	4	4	4	3	4	2	4	3	6	8
	4	5	4	3	3	5	3	5	4	5	3	5	3	5	4	5	1	3	1	5	3	5	6	7
	4	3	3	4	4	5	3	5	2	4	2	4	5	5	2	2	4	5	3	5	5	4	8	9
	5	5	5	5	5	5	5	5	4	5	5	5	4	5	5	3	1	4	1	4	4	5	10	9
	5	5	3	5	4	4	5	4	3	5	4	5	4	5	4	5	3	4	3	5	3	5	10	10
	2	3	2	3	3	3	2	4	2	3	2	3	1	4	1	3	1	3	1	3	1	3	8	8
	3	1	3	1	3	1	3	1	3	1	3	1	2	1	4	1	3	1	4	1	2	1	7	10
Shapiro Wilks
W	0.9183	0.7385	0.9122	0.8769	0.8977	0.7905	0.9175	0.8025	0.9064	0.8577	0.8743	0.7562	0.9172	0.7159	0.885	0.8766	0.8331	0.8593	0.8235	0.8776	0.9178	0.7641	0.8791	0.8738
P value	0.07	<0.0001	0.0526	0.0106	0.0267	0.0004	0.0676	0.0005	0.04	0.0047	0.0094	0.0001	0.0664	<0.0001	0.0151	0.0104	0.0017	0.005	0.0012	0.0109	0.0686	0.0001	0.0116	0.0092
Passed normality test (alpha=0.05)?	Yes	No	Yes	No	No	No	Yes	No	No	No	No	No	Yes	No	No	No	No	No	No	No	Yes	No	No	No
P value summary	ns	****	ns	*	*	***	ns	***	*	**	**	***	ns	****	*	*	**	**	**	*	ns	***	*	**
	Knowledge about each type of study (e.g RCT, Cohort, etc.)	Knowledge about each type of study (e.g RCT, Cohort, etc.)	Knowing when to use each study type	Knowing when to use each study type	Writing a methodology	Writing a methodology	Writing results for a study	Writing results for a study	Writing a discussion for a study	Writing a discussion for a study	Writing an introduction for a study	Writing an introduction for a study	Writing an abstract for a study	Writing an abstract for a study	Knowing how to make a search strategy	Knowing how to make a search strategy	Understanding statistics used in research	Understanding statistics used in research	Performing statistical analysis	Performing statistical analysis	Presenting research as a poster presentation	Presenting research as a poster presentation	On a scale of 1-10, how much are you interested in an academic career? (with 1 meaning 'not at all' and 10 meaning vice-versa)	On a scale of 1-10, how much are you interested in an academic career? (with 1 meaning 'not at all' and 10 meaning vice-versa)
Wicoxon Rank Sum Test
P value		0.2921		0.1474		0.1016		0.0706		0.0566		0.1045		0.0212		0.3066		0.2341		0.1447		0.0074		0.2238
Exact or approximate P value?		Exact		Exact		Exact		Exact		Exact		Exact		Exact		Exact		Exact		Exact		Exact		Exact
P value summary		ns		ns		ns		ns		ns		ns		*		ns		ns		ns		**		ns
Significantly different (P < 0.05)?		No		No		No		No		No		No		Yes		No		No		No		Yes		No
Difference to Yew Ern's analysis?						!!		!!		!!														!!
Yew-Ern's p value		0.2		0.1		<0.05		<0.05		<0.05		>0.05		<0.025		>0.1		>0.05		>0.05		<0.01		<0.05
	Pre course					Post course
	Total score in overall quiz (%)	Raw score in quiz (total questions = 40)				Total score in overall quiz (%)	Raw score in overall quiz, n (total questions = 60)	Raw score in original questions, n (total score = 40)	Raw score in new questions, n (Total score = 20)
	37.5	15				48.3	29	24	5
	5	2				73	44	31	13
	7.5	3				60	36	27	9
	40	16				56	34	27	7
	20	8				65	39	30	9
	50	20				62.5	38	26	12
	40	16				56	34	26	8
	45	18				67	40	24	16
	37.5	15				60	36	33	3
	52.5	21				70	42	24	18
	37.5	15				50	30	21	9
	15	6				57.5	35	27	8
	40	16				43.3	26	21	5
	45	18				45	27	19	8
	5	2				65	39	28	11
	12.5	5				56	34	28	6
	5	2				50	30	23	7
	55	22				69	41	30	11
	2.5	1				48	29	24	5
	50	20				67.5	41	26	15
	30	12				60	36	20	16
	40	16				28.3	17	13	4

## Sheet: New data set RB
	Knowledge about each type of study (e.g RCT, Cohort, etc.)	Knowledge about each type of study (e.g RCT, Cohort, etc.)					Knowing when to use each study type	Knowing when to use each study type					Writing a methodology	Writing a methodology					Writing results for a study	Writing results for a study					Writing a discussion for a study	Writing a discussion for a study					Writing an introduction for a study	Writing an introduction for a study					Writing an abstract for a study	Writing an abstract for a study					Knowing how to make a search strategy	Knowing how to make a search strategy					Understanding statistics used in research
	3	3	0	0	2.5	2.5	3	3	0	0	3	3	3	3	0	0	4.5	4.5	3	3	0	0	3	3	3	3	0	0	2.5	2.5	3	3	0	0	3	3	3	4	1	1	10	10	4	4	0	0	3.5	3.5	3
	2	5	3	3	19.5	19.5	2	5	3	3	20.5	20.5	3	5	2	2	17.5	17.5	2	4	2	2	17	17	3	5	2	2	18	18	3	5	2	2	16.5	16.5	3	4	1	1	10	10	3	4	1	1	10	10	3
	1	5	4	4	21.5	21.5	2	5	3	3	20.5	20.5	2	5	3	3	21.5	21.5	3	5	2	2	17	17	3	5	2	2	18	18	3	5	2	2	16.5	16.5	3	5	2	2	18	18	2	5	3	3	20.5	20.5	3
	2	3	1	1	8	8	3	3	0	0	3	3	3	4	1	1	11.5	11.5	3	4	1	1	9.5	9.5	3	4	1	1	9.5	9.5	3	4	1	1	9.5	9.5	3	4	1	1	10	10	1	3	2	2	16	16	3
	3	5	2	2	15	15	3	4	1	1	10	10	3	4	1	1	11.5	11.5	3	3	0	0	3	3	3	3	0	0	2.5	2.5	3	5	2	2	16.5	16.5	3	5	2	2	18	18	3	3	0	0	3.5	3.5	3
	4	5	1	1	8	8	4	5	1	1	10	10	4	5	1	1	11.5	11.5	4	5	1	1	9.5	9.5	4	5	1	1	9.5	9.5	4	5	1	1	9.5	9.5	4	5	1	1	10	10	4	5	1	1	10	10	4
	4	3	-1	1	8	-8	3	4	1	1	10	10	5	5	0	0	4.5	4.5	4	5	1	1	9.5	9.5	3	4	1	1	9.5	9.5	5	4	-1	1	9.5	-9.5	5	5	0	0	2.5	2.5	3	2	-1	1	10	-10	5
	4	1	-3	3	19.5	-19.5	3	2	-1	1	10	-10	3	2	-1	1	11.5	-11.5	3	2	-1	1	9.5	-9.5	3	2	-1	1	9.5	-9.5	3	2	-1	1	9.5	-9.5	3	2	-1	1	10	-10	3	2	-1	1	10	-10	3
	3	5	2	2	15	15	4	5	1	1	10	10	3	5	2	2	17.5	17.5	4	5	1	1	9.5	9.5	4	5	1	1	9.5	9.5	4	5	1	1	9.5	9.5	4	5	1	1	10	10	3	5	2	2	16	16	3
	5	5	0	0	2.5	2.5	4	4	0	0	3	3	5	5	0	0	4.5	4.5	4	5	1	1	9.5	9.5	3	4	1	1	9.5	9.5	5	5	0	0	3	3	5	4	-1	1	10	-10	4	4	0	0	3.5	3.5	4
	3	1	-2	2	15	-15	3	1	-2	2	17	-17	3	1	-2	2	17.5	-17.5	3	1	-2	2	17	-17	4	1	-3	3	22	-22	4	1	-3	3	21	-21	4	1	-3	3	21.5	-21.5	4	1	-3	3	20.5	-20.5	4
	3	5	2	2	15	15	4	4	0	0	3	3	5	5	0	0	4.5	4.5	5	5	0	0	3	3	5	5	0	0	2.5	2.5	5	5	0	0	3	3	4	5	1	1	10	10	4	5	1	1	10	10	3
	1	5	4	4	21.5	21.5	1	5	4	4	22	22	2	5	3	3	21.5	21.5	2	5	3	3	21.5	21.5	2	4	2	2	18	18	2	5	3	3	21	21	3	5	2	2	18	18	2	5	3	3	20.5	20.5	1
	3	5	2	2	15	15	1	3	2	2	17	17	1	3	2	2	17.5	17.5	1	4	3	3	21.5	21.5	1	3	2	2	18	18	2	5	3	3	21	21	2	4	2	2	18	18	2	4	2	2	16	16	1
	3	1	-2	2	15	-15	4	2	-2	2	17	-17	2	2	0	0	4.5	4.5	2	2	0	0	3	3	2	2	0	0	2.5	2.5	2	2	0	0	3	3	2	2	0	0	2.5	2.5	2	2	0	0	3.5	3.5	1
	4	3	-1	1	8	-8	2	3	1	1	10	10	4	3	-1	1	11.5	-11.5	4	3	-1	1	9.5	-9.5	4	3	-1	1	9.5	-9.5	4	3	-1	1	9.5	-9.5	4	4	0	0	2.5	2.5	4	4	0	0	3.5	3.5	4
	4	5	1	1	8	8	4	3	-1	1	10	-10	3	5	2	2	17.5	17.5	3	5	2	2	17	17	4	5	1	1	9.5	9.5	3	5	2	2	16.5	16.5	3	5	2	2	18	18	4	5	1	1	10	10	1
	4	3	-1	1	8	-8	3	4	1	1	10	10	4	5	1	1	11.5	11.5	3	5	2	2	17	17	2	4	2	2	18	18	2	4	2	2	16.5	16.5	5	5	0	0	2.5	2.5	2	2	0	0	3.5	3.5	4
	5	5	0	0	2.5	2.5	5	5	0	0	3	3	5	5	0	0	4.5	4.5	5	5	0	0	3	3	4	5	1	1	9.5	9.5	5	5	0	0	3	3	4	5	1	1	10	10	5	3	-2	2	16	-16	1
	5	5	0	0	2.5	2.5	3	5	2	2	17	17	4	4	0	0	4.5	4.5	5	4	-1	1	9.5	-9.5	3	5	2	2	18	18	4	5	1	1	9.5	9.5	4	5	1	1	10	10	4	5	1	1	10	10	3
	2	3	1	1	8	8	2	3	1	1	10	10	3	3	0	0	4.5	4.5	2	4	2	2	17	17	2	3	1	1	9.5	9.5	2	3	1	1	9.5	9.5	1	4	3	3	21.5	21.5	1	3	2	2	16	16	1
	3	1	-2	2	15	-15	3	1	-2	2	17	-17	3	1	-2	2	17.5	-17.5	3	1	-2	2	17	-17	3	1	-2	2	18	-18	3	1	-2	2	16.5	-16.5	2	1	-1	1	10	-10	4	1	-3	3	20.5	-20.5	3
Wilcoxon Signed rank test		0.2921						0.1474						0.1016						0.0706						0.0566						0.1045						0.0212						0.3066
P value		Exact						Exact						Exact						Exact						Exact						Exact						Exact						Exact
Exact or approximate P value?		ns						ns						ns						ns						ns						ns						*						ns
P value summary		No						No						No						No						No						No						Yes						No
Significantly different (P < 0.05)?		Two-tailed						Two-tailed						Two-tailed						Two-tailed						Two-tailed						Two-tailed						Two-tailed						Two-tailed
One- or two-tailed P value?		110.5 , -60.50						107.0 , -46.00						79.00 , -26.00						115.5 , -37.50						128.0 , -43.00						112.0 , -41.00						135.5 , -35.50						89.00 , -47.00
Sum of positive, negative ranks		50						61						53						78						85						71						100						42
Sum of signed ranks (W)		22						22						22						22						22						22						22						22
Number of pairs		4						5						8						5						4						5						4						6
Number of ties (ignored)
[truncated: 23 more columns]
