# Supplementary material for: Exploring the Impact of ResearchEazy, an Online Research Series for Medical Students: The Longitudinal Impact of Perspectives and Knowledge of Research
Source: Research Square preprint supplement (doi:10.21203/rs.3.rs-8150678/v1), 2026-01-22
Supplement: Supplementary file 2 [file 8bda637ce487dae7667c6950.docx]

**Qualitative Quiz (Pre and Post Series)**

Likert Scales

- Knowledge about each type of study (e.g RCT, Cohort, etc.)
- Knowing when to use each study type
- Writing a methodology
- Writing results for a study
- Writing a discussion for a study
- Writing an introduction for a study
- Writing an abstract for a study
- Knowing how to make a search strategy
- Understanding statistics used in research
- Performing statistical analysis
- Presenting research as a poster presentation
- How much do you believe that your medical school developed your academic research skillset?
- How much are you interested in an academic career?

What is your current level of training?

Have you completed an intercalated BSc during univesity?

Which medical school do you attend/previous medical school you attended?

**Pre-Session Knowledge Quiz Questions**

Q1. A key feature that distinguishes a cohort study from other observational designs is:

A. Participants are randomly assigned to intervention and control groups

B. Outcomes are compared between groups based on past exposure status

**C. Participants are followed over time based on exposure status**

D. Only one group with a specific disease is enrolled

E. Exposure and outcome are measured at the same time

Q2. In a case–control study, cases and controls are primarily selected based on:

A. Their exposure status

B. Their likelihood of receiving an intervention

C. Their genetic predisposition

**D. Their outcome/disease status**

E. Their geographic location

Q3. The main purpose of randomization in an RCT is to:

A. Ensure equal sample size in all groups

B. Reduce loss to follow-up

**C. Minimize selection bias and balance confounders**

D. Increase generalizability of results

E. Guarantee blinding of participants

Q4. A retrospective cohort study differs from a prospective cohort study because:

A. It includes only cases with the disease

**B. Exposure and outcome have already occurred when the study begins**

C. It does not allow calculation of relative risk

D. Participants are randomized to exposure groups

E. It can only study rare diseases

Q5. A systematic review differs from a traditional narrative review primarily because it:

A. Includes only randomized controlled trials

**B. Uses explicit and reproducible methods to identify and appraise studies**

C. Always includes meta-analysis

D. Is written by a single expert

E. Only summarizes findings without analysis

Q6. You want to investigate whether long-term exposure to air pollution increases the risk of developing asthma, and you plan to follow a group of individuals from exposure into the future.

**A. Cohort study**

B. Case–control study

C. Randomised control trial

D. Retrospective cohort study

E. Systematic review

Q7. A rare brain tumour is being studied. Researchers select patients who already have the tumour and compare their past exposure to a suspected chemical with individuals who do not have the tumour.

A. Cohort study

**B. Case–control study**

C. Randomised control trial

D. Retrospective cohort study

E. Systematic review

Q8. You want to evaluate whether a new antihypertensive drug is more effective than the standard drug by assigning patients randomly to either treatment group.

A. Cohort study

B. Case–control study

**C. Randomised control trial**

D. Retrospective cohort study

E. Systematic review

Q9. A hospital has detailed medical records from the past decade. You want to investigate whether patients previously exposed to a certain medication had a higher incidence of kidney failure. Both exposure and outcome have already occurred.

A. Cohort study

B. Case–control study

C. Randomised control trial

**D. Systematic review**

E. Meta-analysis

Q10. You want to summarise all available evidence on whether intermittent fasting reduces HbA1c levels, following a strict protocol for literature search, screening, and appraisal.

A. Cohort study

B. Randomised control trial

C. Retrospective cohort study

**D. Systematic review**

E. Meta-analysis

Q11. When writing the Methods section of a research paper, which of the following should typically be included first?

A. Statistical analysis plan

**B. Description of study design**

C. Ethical approval details

D. Inclusion and exclusion criteria

E. Description of data collection tools

Q12. A researcher is conducting a study involving human participants. Where in the Methods section should ethical approval most appropriately be reported?

A. Introduction paragraph

B. First line of the Results section

**C. Early in the Methods section, under study approvals**

D. Discussion section

E. Final paragraph of the Abstract

Q13. A researcher wants to clearly explain how participants were recruited into the study. Which subsection of the Methods does this information belong to?

A. Statistical analysis

B. Study design

C. Results

**D. Participant selection**

E. Funding and acknowledgements

Q14. You are writing a paper on a survey-based study. Which of the following MUST be described in the Methods to ensure reproducibility?

A. How long it took to write the survey

B. Colour scheme of the survey interface

**C. Validation or reliability testing of the questionnaire**

D. The investigators who distributed the survey

E. Whether participants liked the survey

Q15. You want to compare the mean systolic blood pressure between two independent groups. The data are normally distributed. Which statistical test is MOST appropriate?

A. Mann–Whitney U test

B. Chi-square test

**C. Independent samples t-test**

D. Kruskal–Wallis test

E. Wilcoxon signed-rank test

Q16. You want to compare median pain scores (non-normal distribution) between two independent treatment groups. Which test should be used?

A. Paired t-test

**B. Mann–Whitney U test**

C. ANOVA

D. Pearson correlation

E. Friedman test

Q17. A study measures fasting glucose levels before and after an intervention in the same participants. The data are normally distributed. Which test is MOST appropriate?

**A. Paired t-test**

B. Chi-square test

C. Mann–Whitney U test

D. Kruskal–Wallis test

E. Fisher’s exact test

Q18. A researcher compares pre- and post-intervention scores in the same individuals, but the data are not normally distributed. Which test should be used?

A. Paired t-test

B. Kruskal–Wallis test

**C. Wilcoxon signed-rank test**

D. One-way ANOVA

E. Pearson’s r

Q19. You want to test the association between smoking status (yes/no) and lung cancer (present/absent) in a large sample. Which test is MOST appropriate?

**A. Chi-square test**

B. Wilcoxon signed-rank test

C. Independent t-test

D. Paired t-test

E. ANOVA

Q20. A researcher wants to determine whether age, BMI, and exercise frequency predict systolic blood pressure (continuous variable). Which analysis is MOST appropriate?

A. Logistic regression

B. Cox regression

C. Pearson correlation

**D. Multiple linear regression**

E. Paired t-test

Q21. In statistical hypothesis testing, what does a p-value of 0.03 indicate regarding the null hypothesis, assuming a significance level (alpha) of 0.05?

A) The null hypothesis is true with 3% probability.

B) There is a statistically insignificant difference, and the null hypothesis is accepted.

**C) There is a statistically significant difference, and the null hypothesis is rejected.**

D) The alternative hypothesis is proven to be false.

E) The alternate hypothesis is false with a probability of 97%

Q22. Which statistical test is most appropriate for comparing the mean blood pressure between two independent groups of patients (e.g., Treatment vs. Placebo) assuming the data is normally distributed?

A) Chi-square test

B) Pearson correlation coefficient

C) Paired t-test

**D) Independent samples t-test**

E) Wilcoxon signed-rank test

Q23. What does a 95% Confidence Interval (CI) for a relative risk of 1.2 (0.9 to 1.5) imply about the result?

**A) The result is not statistically significant because the interval crosses 1.0.**

B) The result is statistically significant.

C) The sample size was definitely too small.

D) There is a 95% chance the true relative risk lies between 0.9 and 1.5.

E) The true value of the relative risk is 1.2

Q24. A researcher commits a Type I error when they:

A) Fail to reject the null hypothesis when it is false.

B) Use a non-parametric test on normal data.

**C) Reject the null hypothesis when it is actually true.**

D) Calculate the sample size incorrectly.

E) Reject the alternate hypothesis when it is actually true

Q25. The primary purpose of the Introduction section of a research paper is to:

A) Provide a comprehensive history of the medical field.

B) Summarise the results of the study in detail.

C) Discuss the limitations of the study design.

**D) Establish the context, identify the knowledge gap, and state the study objective.**

E) Discuss about the study type and design used in the research

Q26. Which sentence would be most appropriate for the very first paragraph of the Discussion section?

**A) Our study demonstrated that Drug X significantly reduced mortality compared to placebo.**

B) Statistical analysis was performed using SPSS version 24.

C) Previous studies have shown conflicting results regarding Drug X.

D) There were 45 participants in the control group and 50 in the intervention group.

E) Ethics was obtained from a institutional Review Board (IRB)

Q27. What is the "funnel" approach to writing an Introduction?

A) Starting with specific details and broadening to general implications.

**B) Starting with a broad context and narrowing down to the specific research question.**

C) Alternating between positive and negative findings.

D) Mixing methods and results together immediately.

E) Mentioning every point in an order

Q28. How should study limitations be handled in the Discussion section?

A) They should be omitted to make the paper sound stronger.

B) They should only be mentioned if the peer reviewers ask for them.

**C) They should be acknowledged, along with an explanation of their potential impact and how they were mitigated.**

D) They should be placed in the Methods section only.

E) They should be briefly mentioned to allow for reviewers to see that it has been written about

Q29. Internal validity refers to:

A) The extent to which the results can be generalised to the wider population.

B) The statistical power of the sample size.

C) The prestige of the journal where the study is published.

**D) The accuracy of the study results for the patients actually enrolled in the study.**

E) The length of the written paper

Q30. Which type of bias occurs if participants are assigned to treatment groups based on the investigator's preference rather than randomisation?

**A) Selection bias**

B) Recall bias

C) Publication bias

D) Attrition bias

E) Blinding bias

Q31. What is the primary purpose of "blinding" in a Randomised Controlled Trial (RCT)?

A) To ensure patients don't know which treatment they are receiving.

**B) To prevent researchers from influencing which group a participant is assigned to before randomisation occurs.**

C) To hide the results of the study until publication.

D) To keep the statistical analysis secret.

E) To write the paper only after the results have been presented at a conference

Q32. In the context of critical appraisal, what is "Recall Bias"?

A) When researchers forget to record data points.

B) When the study fails to recall patients for follow-up.

C) When a diagnostic test is repeated multiple times.

**D) When participants in one group remember past events differently or more accurately than the other group.**

E) When researchers ask participants to report data in a certain way to enhance results

Q33. Which acronym represents the standard structure of a scientific abstract?

**A) IMRAD (Introduction, Methods, Results, And Discussion)**

B) PICOS (Population, Intervention, Comparator, Outcome, Study design)

C) STROBE (Strengthening the Reporting of Observational Studies in Epidemiology)

D) FINER (Feasible, Interesting, Novel, Ethical, Relevant)

E) PRISMA (Preferred Reporting Items for Systematic reviews and Meta-Analyses)

Q34. Which of the following should generally be AVOIDED in a research abstract (in a publication)?

A) Specific data values (e.g., means, p-values).

B) Definitions of key acronyms.

**C) Citations to other literature.**

D) A brief statement of the conclusion.

E) Figures and diagrams

Q35. What is the primary function of keywords listed after an abstract?

A) To explain difficult terms used in the paper.

B) To add extra information that didn't fit in the word count.

C) To list the authors' affiliations.

**D) To help databases index the article and improve searchability.**

E) To help journals include new terminology in their dictionary

Q36. A "Structured Abstract" is characterised by:

A) Having no word limit.

**B) Using distinct headings like Background, Methods, Results, and Conclusion.**

C) Being written in bullet points only.

D) Focusing only on the statistical methods.

E) A summary of the whole paper in prose format

Q37. How should you handle the Question & Answer (Q&A) session after a presentation?

A) Interrupt the questioner if you know the answer.

**B) Repeat or paraphrase the question before answering.**

C) Fake an answer if you don't know it.

D) Only accept questions from senior researchers.

E) Challenge the person asking the question

Q38. Which structure is most effective for a research presentation?

A) Chronological order of what you did day-by-day.

B) Mystery novel style (reveal the topic only at the end).

**C) The same IMRAD structure as the paper (Introduction, Methods, Results, Discussion).**

D) Methods first, then Introduction, then Conclusion.

E) Reading the written paper word-for-word

Q39. Which of Bradford Hill's criteria for causation is considered the only essential one?

**A) Temporality**

B) Biological Plausibility

C) Strength of Association

D) Specificity

E) Sensitivity

Q40. External validity (Generalisability) assesses:

A) Whether the control group was matched correctly.

**B) Whether the study findings can be applied to patients outside the study setting.**

C) Whether the p-value was calculated correctly.

D) Whether the study was published in a high-impact journal.

E) Whether the study was written generally

**Post-Session Knowledge Quiz Questions**

Q1. The main purpose of a meta-analysis is to:

A. Provide a descriptive summary of selected studies

**B. Combine data from multiple studies to generate a pooled effect estimate**

C. Replace the need for randomized controlled trials

D. Identify causal mechanisms for disease

E. Provide qualitative synthesis of literature

Q2. Multiple published RCTs have compared two surgical techniques. You want to combine their quantitative results to compute a pooled estimate of effect size.

A. Cohort study

B. Case–control study

C. Randomised control trial

D. Systematic review

**E. Meta-analysis**

Q3. You want to determine the overall effect of vitamin D supplementation on fracture risk by combining numerical results from several high-quality studies that have already been published.

A. Cohort study

B. Case–control study

C. Randomised control trial

D. Systematic review

**E. Meta-analysis**

Q4. A study involves collecting identifiable patient information from medical records. Which of the following is most important to report in the Methods section regarding ethics?

A. The researcher’s academic qualifications

B. Whether patient names were included in the results

C. How missing data were handled

**D. Details of consent procedures or justification for waiver of consent**

E. The number of authors who wrote the manuscript

Q5. When describing the study setting in the Methods section, which of the following is the MOST essential to include?

A. The personal motivations of the research team

**B. The geographical or institutional location where the study was conducted**

C. A summary of the study’s main findings

D. A detailed review of previous literature

E. The order in which authors contributed to the paper

Q6. A researcher conducts a randomised controlled trial. Which of the following is MOST important to report in the Methods regarding blinding?

A. Whether participants enjoyed being part of the study

B. The authors’ opinions on which treatment is superior

**C. Who was blinded (participants, investigators, outcome assessors) and how blinding was maintained**

D. Only the final results of the blinding check

E. The marketing name of the intervention

Q7. Which statistical method is MOST appropriate for identifying predictors of a binary outcome, such as “disease present vs absent”?

A. Linear regression

**B. Logistic regression**

C. Spearman correlation

D. Chi-square test

E. ANOVA

Q8. A researcher wants to measure the strength of association between two continuous variables that are not normally distributed. Which test is MOST appropriate?

A. Pearson correlation

**B. Spearman rank correlation**

C. Chi-square test

D. ANOVA

E. Mann–Whitney U test

Q9. A researcher wants to compare the mean cholesterol levels across three independent diet groups. The data are not normally distributed. Which statistical test is MOST appropriate?

A. One-way ANOVA

**B. Kruskal–Wallis test**

C. Paired t-test

D. Chi-square test

E. Friedman test

Q10. A study aims to identify factors associated with time to death after cancer diagnosis, and some participants are still alive at the end of follow-up (censored data). Which statistical method is MOST appropriate?

A. Linear regression

B. Logistic regression

**C. Cox proportional hazards regression**

D. Wilcoxon signed-rank test

E. Pearson correlation

Q11. Which of the following describes a "confounding variable"?

A) A variable that is the direct result of the intervention.

**B) A variable associated with both the exposure and the outcome, but not on the causal pathway.**

C) Any variable that makes the study difficult to conduct.

D) A variable that randomly introduces error into the measurements.

E) A type of a dependent variable

Q12. Which of the following belongs in the Results section rather than the Discussion?

**A) Tables and figures summarizing the data collected.**

B) Comparison of findings with previous literature.

C) Speculation on the biological mechanism of the findings.

D) Suggestions for future research.

E) The limitations of the paper

Q13. Which study design typically sits at the top of the "Hierarchy of Evidence" for clinical interventions?

A) Case Series

B) Expert Opinion

**C) Systematic Review of Randomised Controlled Trials (RCTs)**

D) Cohort Study

E) Case-control Study

Q14. If the main paper's conclusion is that "Drug X may be effective," the abstract conclusion should:

**A) Reflect the same level of certainty as the main paper.**

B) State "Drug X is definitely effective" to attract readers.

C) Omit the conclusion to force people to read the full text.

D) Introduce a new hypothesis not mentioned in the paper.

E) Speculate on what the paper might say

Q15. When designing slides for a research presentation, which practice is recommended?

A) Paste the full abstract text onto the first slide.

B) Read the slides verbatim to the audience.

**C) Use high-contrast colours and a large font size (e.g., >24pt).**

D) Include every single table from the paper.

E) Attach a link of the published paper at the beginning

Q16. What is the "10-20-30 Rule" often cited for presentations (by Guy Kawasaki)?

**A) 10 slides, 20 minutes, 30 point font minimum.**

B) 10 minutes, 20 slides, 30 people in the audience.

C) 10 data points, 20 citations, 30 seconds per slide.

D) 10 images, 20 words per slide, 30 minutes total.

E) 10 minutes, 20 point fort, 30 slides

Q17. When presenting a graph on a slide, you should always:

A) Remove all axis labels to save space.

B) Use as many 3D effects as possible.

C) Assume the audience understands the data immediately.

**D) Explain the axes and what the graph demonstrates to the audience.**

E) Include the relevant results section below

Q18. What does "Intention-to-Treat" (ITT) analyse help preserve in a randomised trial?

A) The purity of the data by removing non-compliant patients.

B) The blinding of the surgeon.

C) The sample size reduction.

**D) The benefits of randomisation.**

E) The analysis of data on a per-protocol basis

Q19. The Number Needed to Treat (NNT) is calculated as:

A) The inverse of the Relative Risk (1 / RR).

B) The rate in the control group minus the rate in the treatment group.

C) The inverse of the Absolute Risk Reduction (1 / ARR).

D) Absolute Risk Reduction x 100.

E) The hazard ratio/risk ratio

Q20. In critical appraisal, "clinical significance" differs from "statistical significance" because:

A) They are actually the same thing.

B) Statistical significance is subjective.

**C) Statistical significance relies on maths, while clinical significance assesses if the effect size matters for patient care.**

D) Clinical significance is always determined by p < 0.05.

E) Statistical significance is the Number Needed to Treat (NNT)
